# Supplementary material
Source: publisher figshare collection journal article supplement (https://acs.figshare.com/ndownloader/files/4558600)

## **Supporting Information**

Morphological Changes from Silica Tubules to Hollow Spheres

Controlled by the Intermolecular Interactions within Block

Copolymer Micelle Templates

*Hyemin Lee and Kookheon Char\**

Contribution from the School of Chemical and Biological Engineering,  
Interdisciplinary Program in Nano-Science & Technology,  
Center for Functional Polymer Thin Films,  
Seoul National University,  
San 56-1, Shillim-dong, Kwanak-gu, Seoul 151-744, Korea

**Figure S1.** Size distribution of hollow spheres and tubules characterized by TEM. Almost equal number of objects ( $\sim 100$ ) was counted for each case and the number fraction is presented for hollow spheres and tubules.

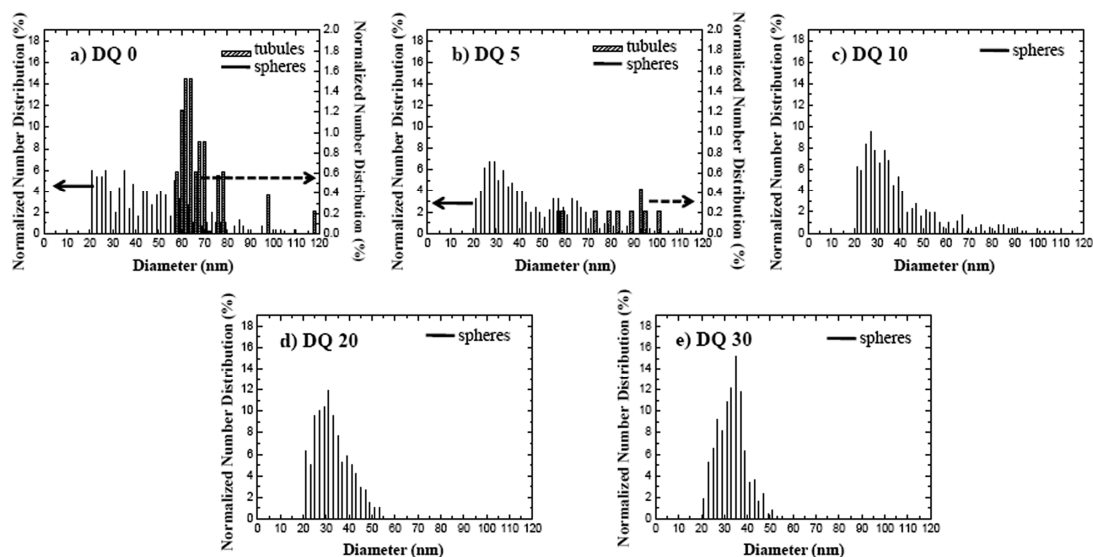

**Figure S2.** Size distribution of hollow tubules and spheres, which were obtained by increasing the ethanol content, characterized by TEM. Almost equal number of objects ( $\sim 100$ ) was examined for each case.

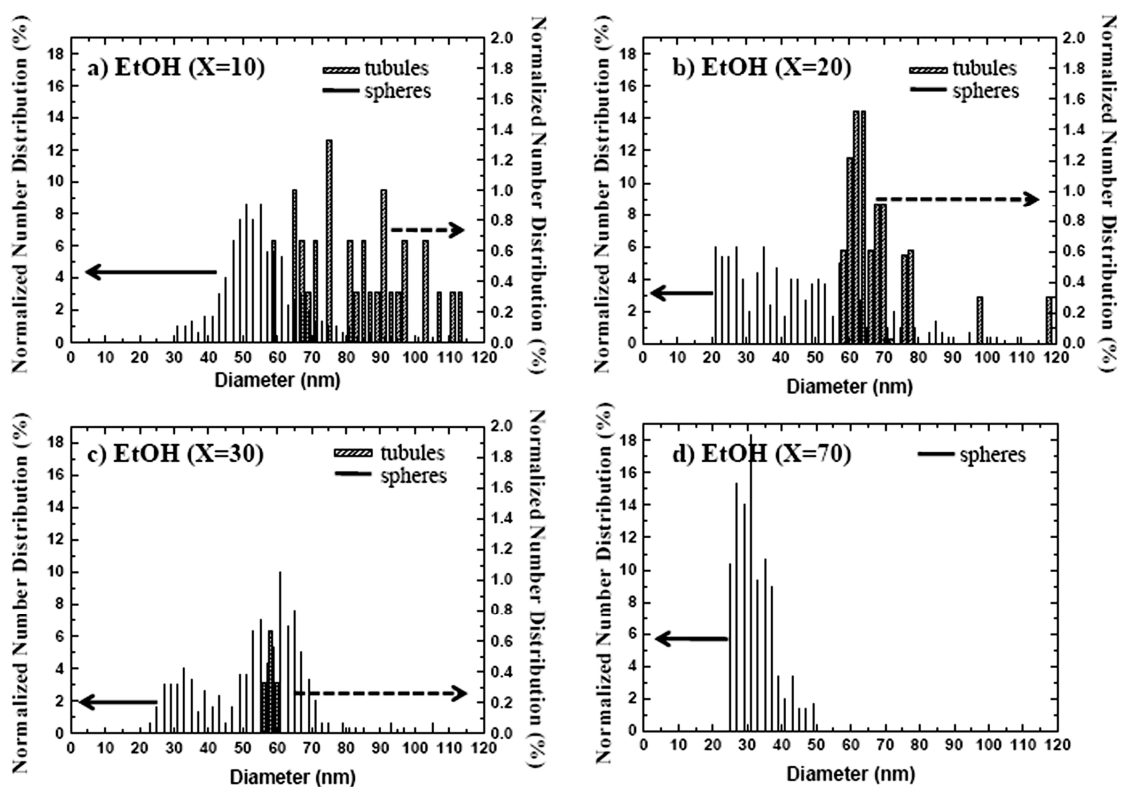

Supplement: Supplementary file 1 [file 4558600]
